# Supplementary material for: Phylogeography of amphi-boreal fish: tracing the history of the Pacific herring Clupea pallasii in North-East European seas
Source: PubMed Central journal article supplement (PMC3637224; doi:10.1186/1471-2148-13-67), 2013-03-19
Supplement: 1471-2148-13-67-S3.pdf [file 1471-2148-13-67-S3.pdf]

**Additional file 4: Tables S1 and S2**

**Table S1: Age estimates for demographic events from mismatch distributions and from Bayesian skyline plot analysis** (summarizing inferences from the analyses presented in Figure 5.). Mean pairwise differences and inferred calendar years from Figure 5, assuming the operational long-term per-site substitution rates of  $u = 0.75\% \text{ My}^{-1}$  (cyt-b) and  $2.7\% \text{ My}^{-1}$  (CR). The mismatch signals were taken directly from the prominent peaks in the distributions. The most recent expansion represented by the zero modes was however calculated directly as an average from the first two bars (0 and 1 differences). The BSL signals were determined visually from the graphs, as the starting point of a prominent rise in the trajectory. The deepest BSL signal corresponds to the basal coalescence (median estimate of the root). The difference estimates (%) for mismatch plots are observed values, those for BSL from the model-corrected scale. The “age” estimates for both are corrected (see Additional file 1).

| Genetic group             | Mismatch peaks |      |      |                |      |      |         | BSL expansion signals |      |      |                |      |      |      |
|---------------------------|----------------|------|------|----------------|------|------|---------|-----------------------|------|------|----------------|------|------|------|
|                           | Cytochrome b   |      |      | Control region |      |      |         | Cytochrome b          |      |      | Control region |      |      |      |
| <b>Balsfjord</b>          |                |      |      |                |      |      |         |                       |      |      |                |      |      |      |
| Difference (%)            | 0.019          | -    | -    | 0.044          | -    | -    | -       | 0.02                  | -    | -    |                |      |      |      |
| Age (kyr)                 | 26             | -    | -    | 16             | -    | -    | -       | 27                    | -    | -    |                |      |      |      |
| <b>White Sea</b>          |                |      |      |                |      |      |         |                       |      |      |                |      |      |      |
| Difference (%)            | 0.013          | 0.27 | -    | 0.014          | 0.41 | -    | -       | 0.03                  | 0.2  | -    | 0.04           | 0.37 | -    | -    |
| Age (kyr)                 | 18             | 370  | -    | 5              | 160  | -    | -       | 33                    | 270  | -    | 13             | 140  | -    | -    |
| <b>Mezen–Chesha</b>       |                |      |      |                |      |      |         |                       |      |      |                |      |      |      |
| Difference (%)            | 0.015          | 0.27 | -    | 0.015          | 0.41 | -    | -       | 0.03                  | 0.4  | -    | 0.04           | 0.45 | -    | -    |
| Age (kyr)                 | 20             | 380  | -    | 6              | 160  | -    | -       | 33                    | 530  | -    | 13             | 170  | -    | -    |
| <b>NW Pacific</b>         |                |      |      |                |      |      |         |                       |      |      |                |      |      |      |
| Difference (%)            | (0.018)        | 0.18 | -    | (0.030)        | 0.41 | 0.82 | -       | 0.04                  | 0.27 | -    | 0.10           | 1.00 | 1.30 | -    |
| Age (kyr)                 | (25)           | 250  | -    | (11)           | 160  | 350  | -       | 53                    | 360  | -    | 37             | 370  | 480  | -    |
| <b>NE Pacific</b>         |                |      |      |                |      |      |         |                       |      |      |                |      |      |      |
| Difference (%)            | -              | 0.27 | 0.67 | -              | -    | 0.72 | 1.34    | 0.05                  | 0.34 | 0.69 | 0.10           | -    | 1.00 | 2.10 |
| Age (kyr)                 | -              | 400  | 990  | -              | -    | 350  | 610     | 67                    | 450  | 920  | 37             | -    | 370  | 770  |
| <b><i>C. harengus</i></b> |                |      |      |                |      |      |         |                       |      |      |                |      |      |      |
| Difference (%)            | -              | 0.31 | 0.57 | -              | -    | 0.93 | 1.4–1.7 | -                     | 0.37 | 0.74 | -              | -    | 1.80 | 3.90 |
| Age (kyr)                 | -              | 450  | 830  | -              | -    | 440  | 700–800 | -                     | 490  | 990  | -              | -    | 670  | 1430 |

**Table S2: IM-model analysis results** (a more detailed version of the results presented in Table 4 of the paper). IM-model based analysis of Pacific-Atlantic relationships from coalescence simulations on the trans-Arctic clade cyt-b data.  $\theta$  = population mutation parameter describing the population size and diversity in the NWP, European and Ancestral populations;  $s$  = population splitting parameter,  $m$  = gene flow ( $m1$  = migration to NWP,  $m2$  = migration to Europe) and  $t$  time since divergence in absolute mutation units. Effective population sizes  $N_e$  and time of divergence in calendar years are based on the assumed per gene mutation rate 8.48 % My<sup>-1</sup>;  $N_e$  are also scaled assuming a 4-yr generation time (Dmitriev NA: Biology and Fishery of Herring in the White Sea. Moscow: Pishchepromizdat; 1946).

| Comparison                       | $\theta_{\text{NWP}}$ | $\theta_{\text{Eur}}$ | $\theta_{\text{A}}$ | 1 - $s$ | $m1$ | $m2$ | $t$  | $N_{e\text{NWP}} \times 10^6$ | $N_{e\text{Eur}} \times 10^6$ | $N_{e\text{A}}$ | $t$ (ky) |
|----------------------------------|-----------------------|-----------------------|---------------------|---------|------|------|------|-------------------------------|-------------------------------|-----------------|----------|
| NW Pacific vs:                   |                       |                       |                     |         |      |      |      |                               |                               |                 |          |
| -White Sea group                 | 986                   | 954                   | 74                  | 0.80 %  | 2.98 | 0    | 0.44 | 7.3                           | 7                             | 540 000         | 52       |
| Lower 90% HPD                    | 484                   | 535                   | 47                  | 2.90 %  | 0.94 | 0    | 0.30 | 3.6                           | 3.9                           | 350 000         | 36       |
| Upper 90% HPD                    | [1000]                | [1000]                | 109                 | 0.00 %  | 5.47 | 0.4  | 0.63 | 7.4                           | 7.4                           | 800 000         | 75       |
| -White Sea group <sup>b</sup>    | 938                   | 100                   | 54                  | 1.80 %  | 1.33 | 0.14 | 0.59 | 6.9                           | 0.74                          | 400 000         | 70       |
| Lower 90% HPD                    | 274                   | 84                    | 27                  | 8.20 %  | 0.86 | 0    | 0.57 | 2.0                           | 0.62                          | 200 000         | 67       |
| Upper 90% HPD                    | [1000]                | [100]                 | 96                  | 0.60 %  | 2.75 | 0.4  | 1.49 | 7.4                           | 0.74                          | 710 000         | 175      |
| -Mezen-Chesha group <sup>a</sup> | 987                   | 18                    | 83                  | 1.10 %  | 4.99 | 0    | 0.43 | 4.4                           | 0.13                          | 610 000         | 51       |
| Lower 90% HPD                    | 476                   | 8                     | 46                  | 6.90 %  | 1.45 | 0    | 0.25 | 3.5                           | 0.06                          | 340 000         | 29       |
| Upper 90% HPD                    | [1000]                | [1000]                | 129                 | 0.00 %  | 8.93 | 0.71 | 1.50 | 7.4                           | 7.4                           | 950 000         | 177      |
| -Balsfjord <sup>a</sup>          | 760                   | 6                     | 41                  | 0.05 %  | 0.65 | 0    | *    | 5.6                           | 0.04                          | 300 000         | -        |
| Lower 90% HPD                    | 531                   | 2                     | 9                   | 51.30 % | 0.1  | 0    | *    | 3.9                           | 0.01                          | 60 000          | -        |
| Upper 90% HPD                    | [1000]                | 92                    | 95                  | 0.00 %  | 1.19 | 0.7  | *    | 7.4                           | 0.67                          | 700 000         | -        |

<sup>a</sup> Upper limits for prior distribution of  $\theta$  set to 1000.

<sup>b</sup> Upper limits for prior distribution of  $\theta$  were set to  $\theta_{\text{NWP}}=1000$ ,  $\theta_{\text{Eur}}=100$  and  $\theta=100$ .

\*The analysis did not converge.
