# Supplementary material for: Phylogeography of amphi-boreal fish: tracing the history of the Pacific herring Clupea pallasii in North-East European seas
Source: PubMed Central journal article supplement (PMC3637224; doi:10.1186/1471-2148-13-67), 2013-03-19
Supplement: 1471-2148-13-67-S4.pdf [file 1471-2148-13-67-S4.pdf]

**Additional file 2: Figure S1:** Neighbor-joining tree of mtDNA haplotypes from CR data.

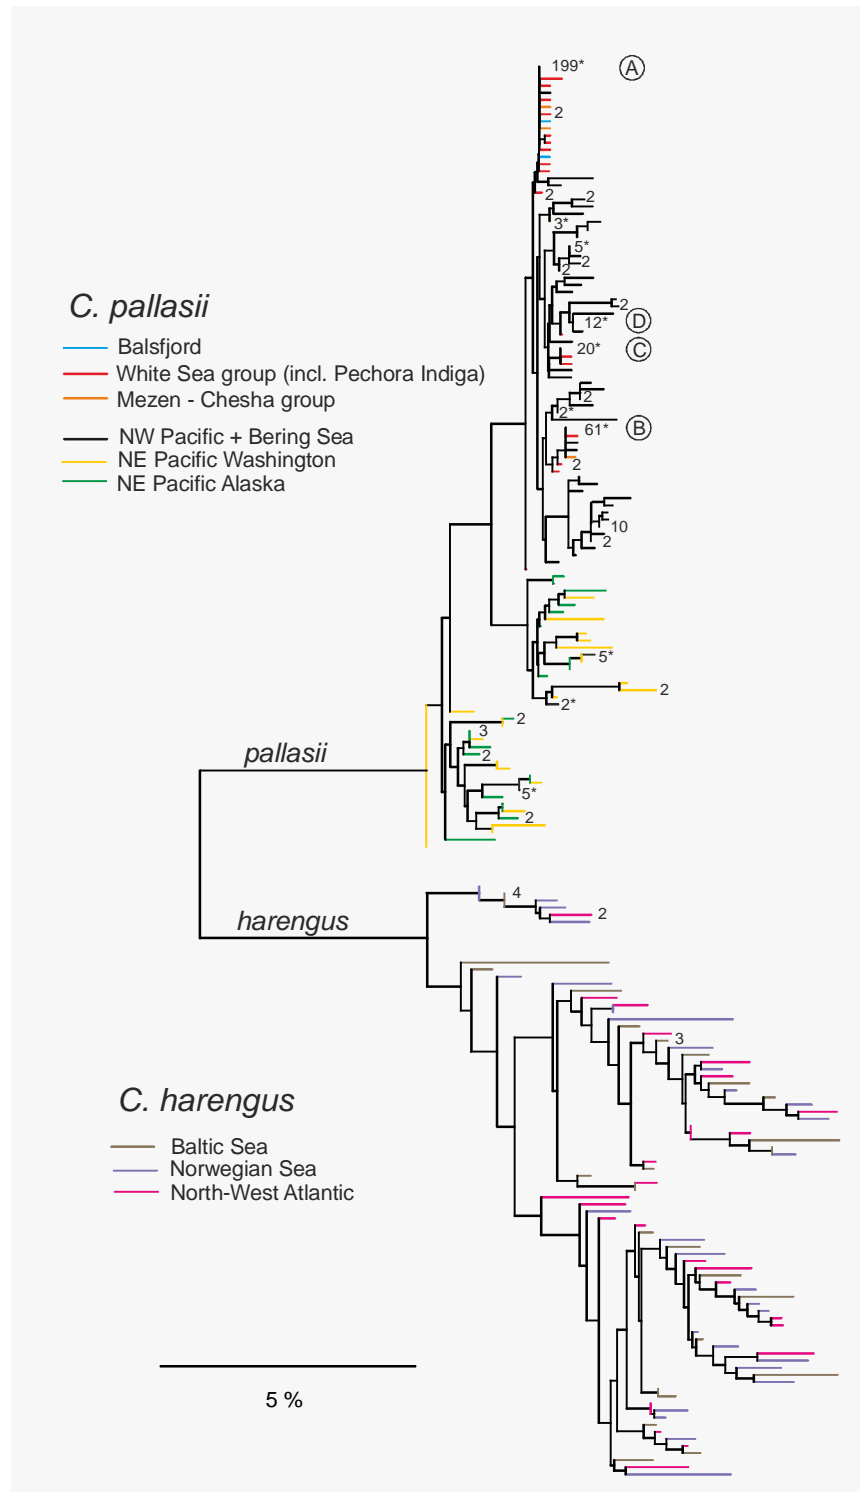

**Figure S1: Neighbor-joining tree of mtDNA haplotypes from CR data.** The tree is based on GTR+I+ $\Gamma$  model distances, and is comparable to the figures for *cyt-b* and concatenated data presented in Figure 2 of the paper itself. The numbers are observed frequencies of haplotypes found in multiple individuals; haplotypes shared between localities are indicated with asterisks. Color codes refer to population groups as in Figure 1. The core haplotypes A-D from Figure 3 are indicated.
